# Supplementary material for: Self-assembled SnO2micro- and nanosphere-based gas sensor thick films from an alkoxide-derived high purity aqueous colloid precursor
Source: Royal Society of Chemistry journal article supplement (doi:10.1039/c5nr07942j), 2016-01-01
Supplement: c5nr07942j1.pdf [file c5nr07942j1.pdf]

# Self-assembled SnO<sub>2</sub> micro- and nanospheres-based gas sensor thick films from alkoxide-derived high purity aqueous colloid precursor

*Glen Kelp<sup>1,2</sup>, Tanel Tätte<sup>1,\*</sup>, Siim Pikker<sup>1</sup>, Hugo Mändar<sup>1</sup>, Aleksey G. Rozhin<sup>3</sup>, Protima Rauwel<sup>4</sup>,  
Alexander S. Vanetsev<sup>1</sup>, Alar Gerst<sup>1</sup>, Mairo Merisalu<sup>1</sup> Uno Mäeorg<sup>5</sup>, Marco Natali<sup>6</sup>, Ingmar  
Persson<sup>7</sup>, Vadim G. Kessler<sup>7</sup>*

<sup>1</sup>Institute of Physics, University of Tartu, Ravila 14C, 50411, Tartu, Estonia

<sup>2</sup>Department of Physics, The University of Texas at Austin, Austin, Texas 78712, USA

<sup>3</sup>Aston University, Aston Triangle, Birmingham, B4 7ET, UK

<sup>4</sup>Department of Physics, Centre for Materials Science and Nanotechnology, University of Oslo,  
PO Box 1048 Blindern, N-0316 Oslo, Norway

<sup>5</sup>Institute of Chemistry, University of Tartu, Ravila 14A, 50441, Tartu, Estonia

<sup>6</sup>ICIS-CNR, Corso Stati Uniti 4, 35127 Padova, Italy

<sup>7</sup> Department of Chemistry and Biotechnology, Swedish University of Agricultural Sciences,  
P.O. Box 7015, SE-756 51 Uppsala, Sweden

\*Ravila 14c, 50411, Tartu, ESTONIA; tanel.tatte@ut.ee

## Supporting Information

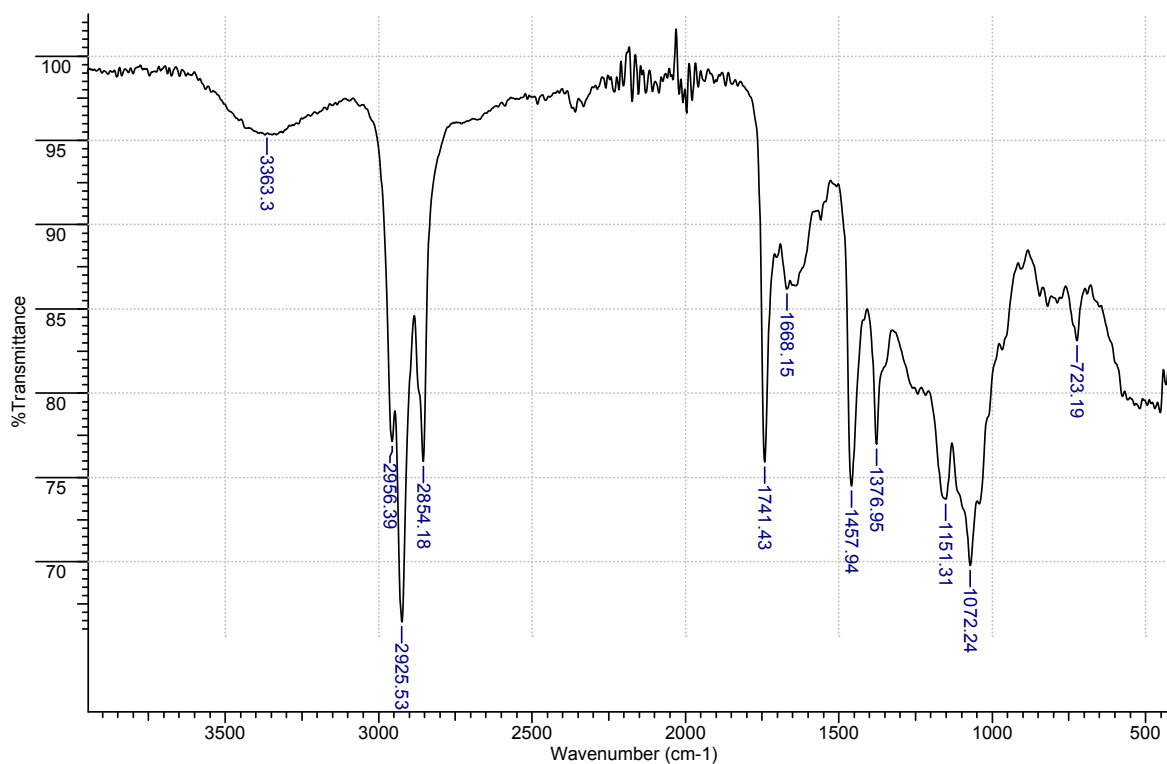

**Figure S1:** An IR spectrum of dark-brown solid obtained as a result of concentration of the butanol layer formed during precursor preparation. The spectrum proves presence of C=O ( $1741\text{ cm}^{-1}$ ) and C-O ( $1072\text{ cm}^{-1}$ ) as ester groups, which probably originate from esterification of disproportionation products of butanol. Intense color of the substance is probably related to condensation of intermediates of butanol oxidation.
